# Supplementary material
Source: Springer Nature journal article supplement (https://www.springermedizin.de/resource/supplementary/12889_2014_7258_MOESM1_ESM.pdf/9497234)

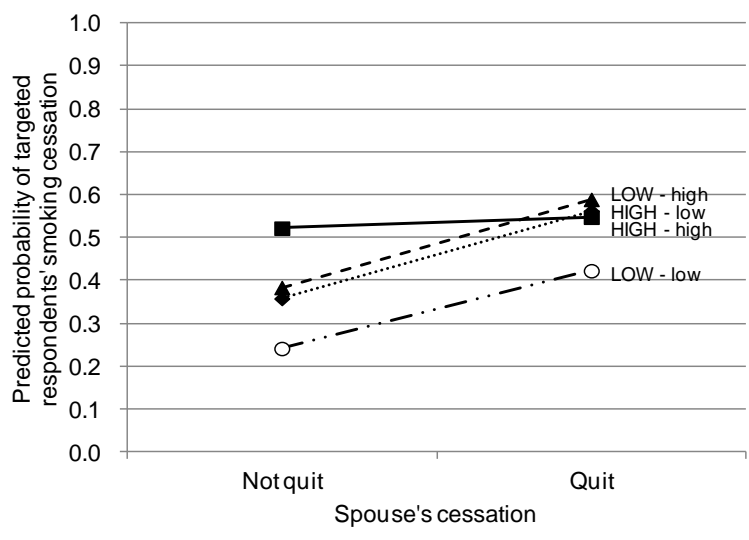

Figure 1

Supplement: MOESM1 [file 9497234]
